# Supplementary material for: Imperfect interface of Beclin1 coiled-coil domain regulates homodimer and heterodimer formation with Atg14L and UVRAG
Source: PubMed Central journal article supplement — Nat Commun. 2012 Feb 7;3:662–. doi: 10.1038/ncomms1648 (PMC3293417; doi:10.1038/ncomms1648), 2012-02-07
Supplement: ncomms1648-s1.pdf [file ncomms1648-s1.pdf]

## Supplementary Figures

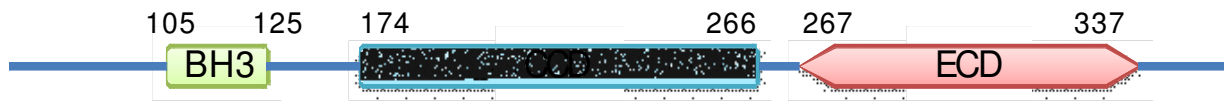

### Supplementary Figure S1. The domain structure of Beclin 1.

Beclin 1 contains a BH3 domain, a coiled coil domain (CCD) and an evolutionarily conserved domain (ECD).

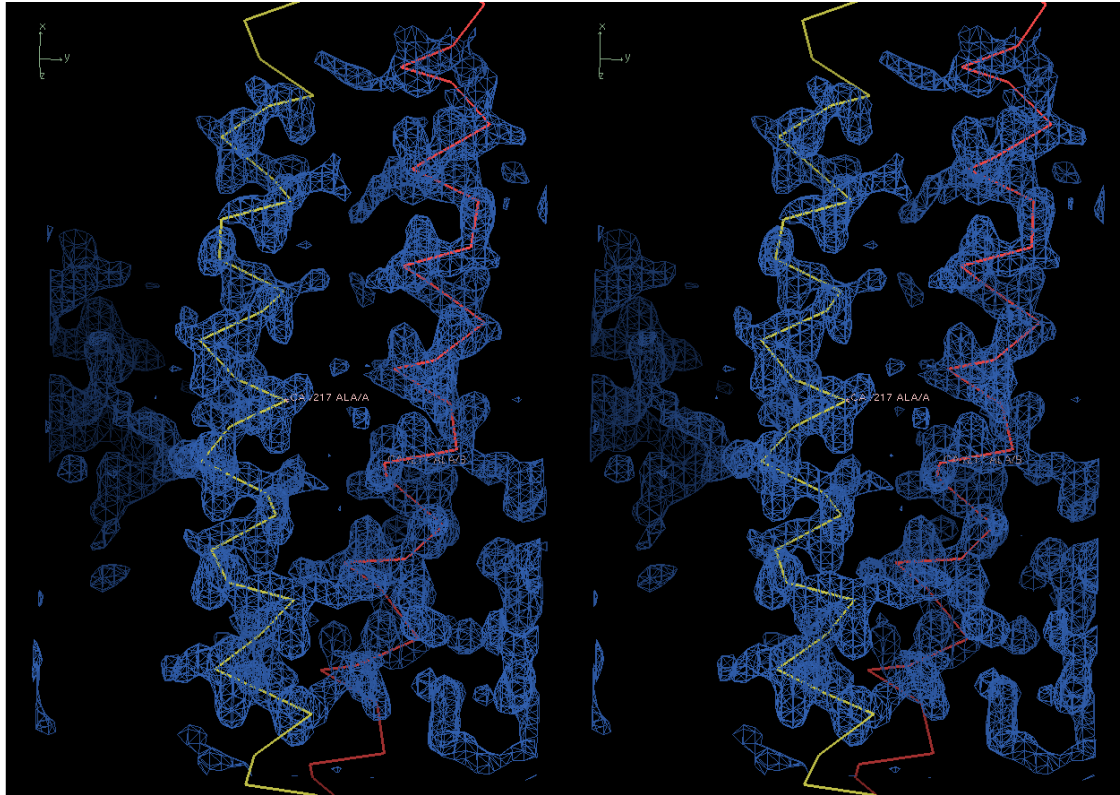

**Supplementary Figure S2. Stereo representation of electron density map for the central region of Beclin 1 CC domain**

2Fo-Fc electron density map, contoured at  $2\sigma$  level, for the central region of the Beclin 1 CC domain near A217. The dimeric protein structure is shown in C $\alpha$  trace in yellow and red color.

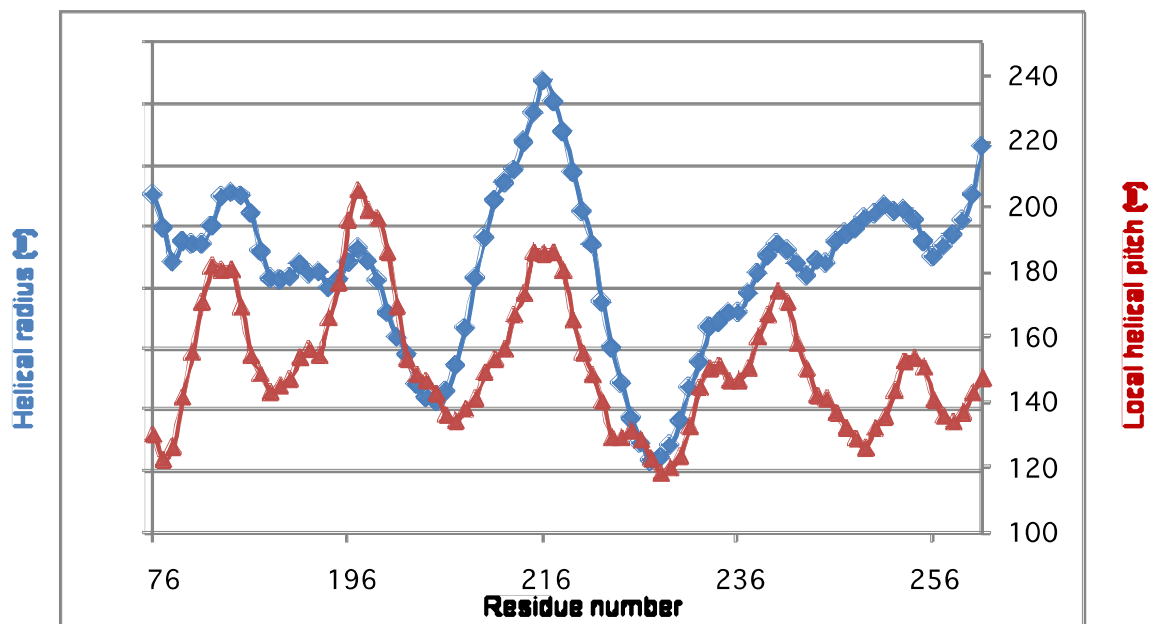

### Supplementary Figure S3. Beclin 1 CC domain analyzed by TWISTER

The parameters for the coiled coil geometry of Beclin 1 CC domain, including the helical radius and the local helical pitch, were analyzed using TWISTER<sup>42</sup> and plotted by residue number.

## Interhelical Repulsive

## Intrahelical Stabilizing

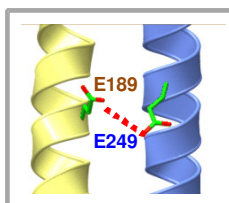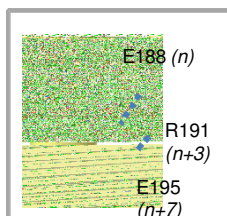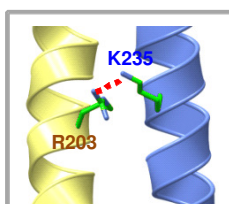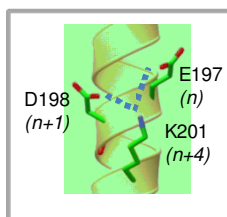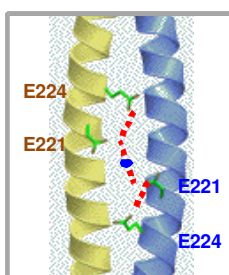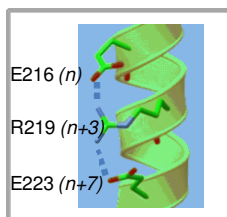

### Supplementary Figure S4. The imperfect dimer interface of Beclin 1 CC domain

The notable electrostatic interactions at the dimer interface of Beclin 1 CC domain are plotted, including the interhelical repulsive interactions (left) and intrahelical stabilizing interactions (right). The two Beclin 1 CC domain molecules are shown in ribbons style and colored yellow or blue. The residues involved in the electrostatic interactions are shown in stick model and cpk coloring. The dashed lines indicate the electrostatic interactions. The oval dot indicates 2-fold symmetry.

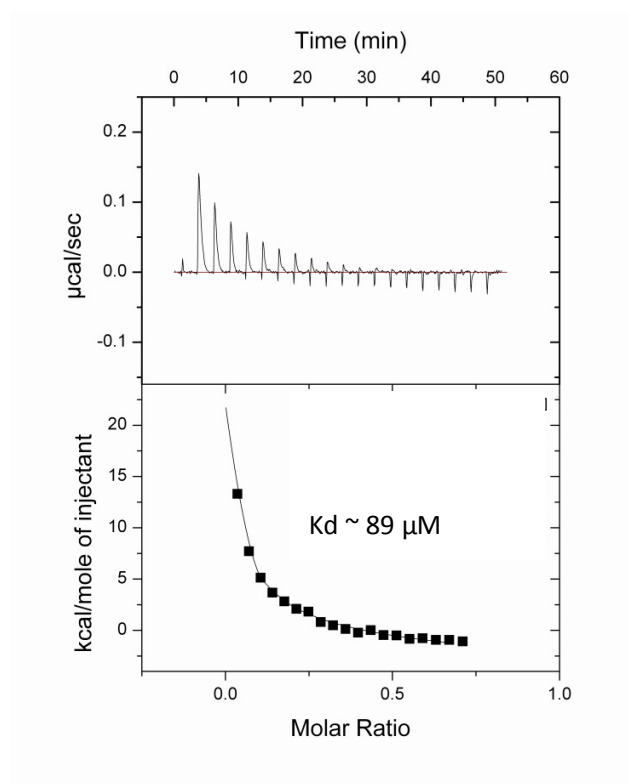

**Supplementary Figure S5. Estimation of the self-dissociation constant ( $K_d$ ) of Beclin 1 CC domain.**

The ITC titration profile of Beclin 1 CC domain at buffer condition of pH 8.0, 150 mM NaCl.

The background of this ITC profile has been corrected for the buffer-to-buffer effect.

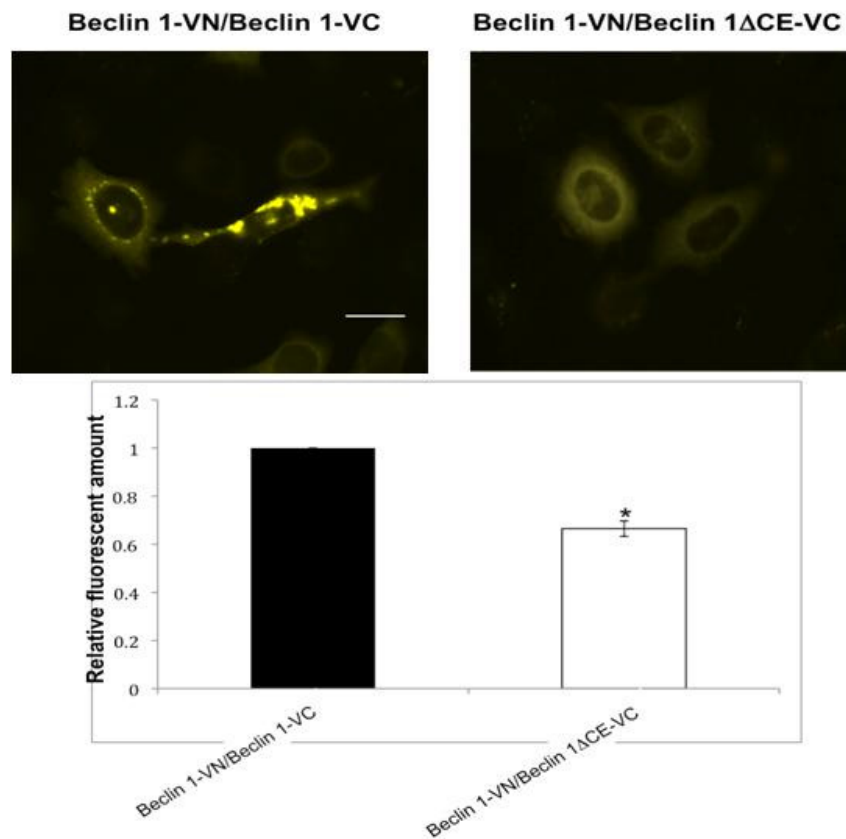

**Supplementary Figure S6. Bimolecular fluorescence complementation (BiFC) assay to assess Beclin 1 self-association *in vivo*.**

(top) Representative fluorescent images (YFP) acquired from HeLa cells co-expressing Beclin 1-VN and Beclin 1-VC or Beclin 1( $\Delta$ CE)-VC. Beclin 1( $\Delta$ CE) is a dimerization deficient mutant of Beclin 1 with CC domain deleted and used as a negative control. VN and VC refer to the N- and C-terminal constructs of YFP as designed by Hu *et. al*. Scale bar, 20  $\mu$ M. (2) (bottom) fluorescence quantification was acquired from three independence experiments. \*  $p=0.006$ . Student *t* test. Error bar,  $\pm$  SEM,  $n=3$ .

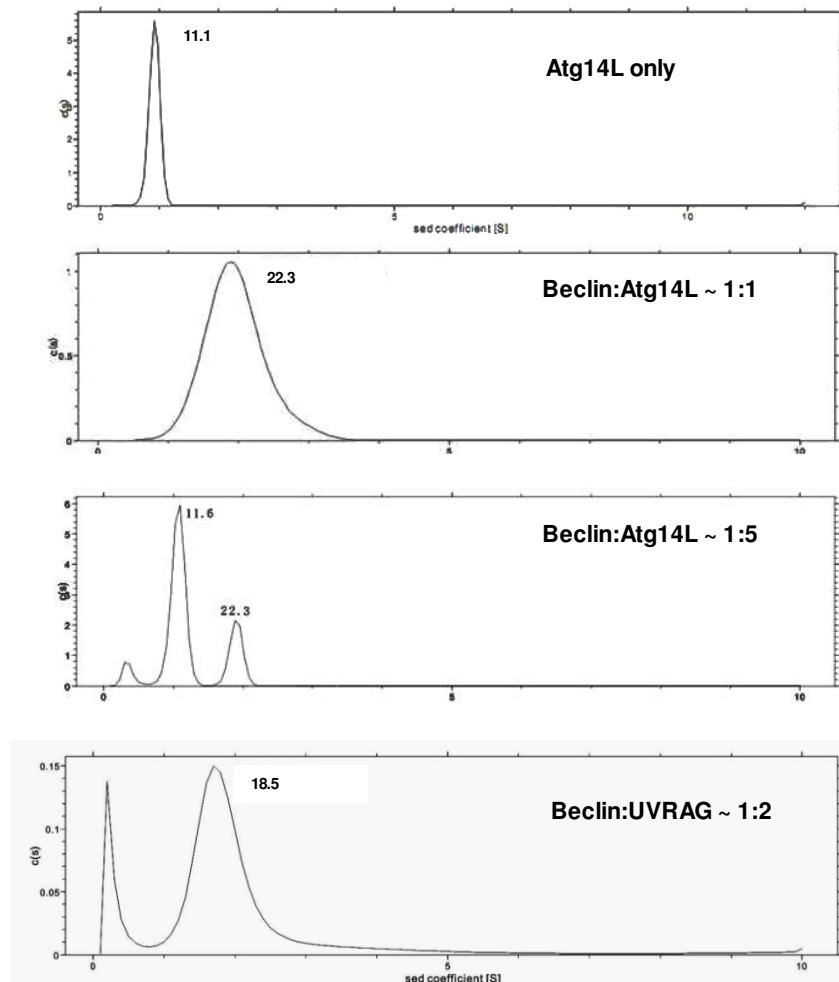

### Supplementary Figure S7. Stoichiometry of Beclin 1 CC domain-Atg14L/UVRAG complex

The sedimentation velocity profile of Atg14L coiled coil region alone, and the complex of Beclin 1 CC domain with Atg14L and UVRAG coiled coil region respectively as measured by analytical ultracentrifugation. The numbers marked near the peaks of the curves indicate the estimated molecular weight of the corresponding protein samples. The molar ratio of the two proteins in the mixture for each experiment is indicated on the right of the profile panel.

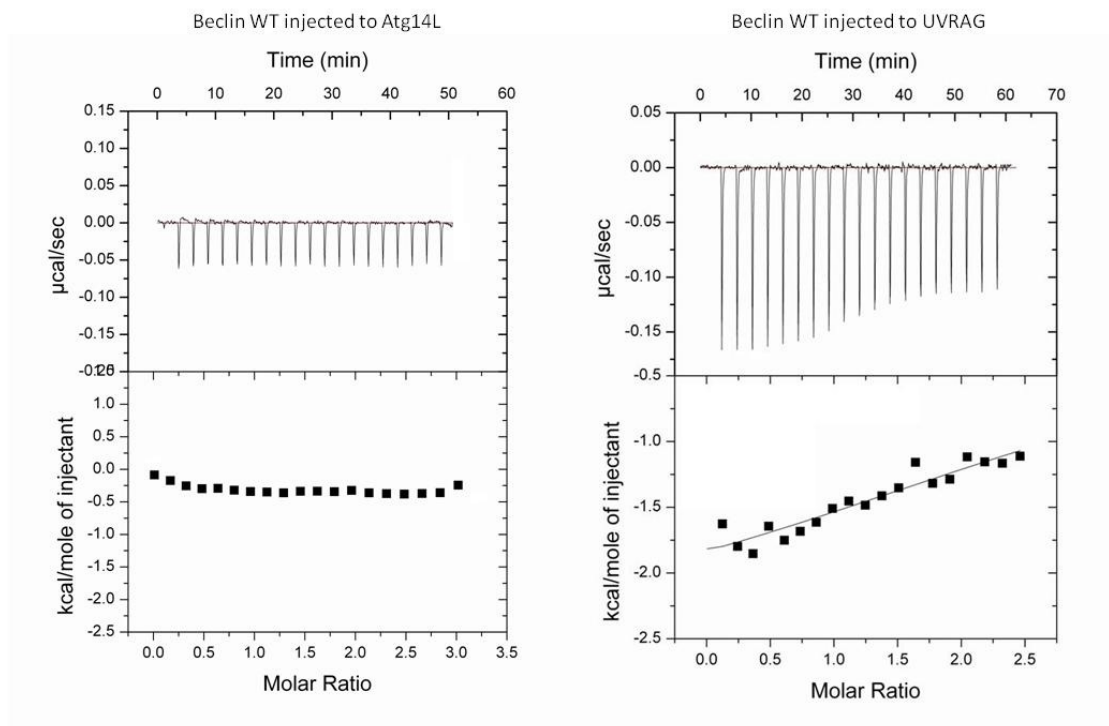

**Supplementary Figure S8. Interaction of Beclin 1 CC domain with Atg14L and UVRAG under high-salt condition**

The ITC titration profile of Beclin 1 CC domain with the coiled coil region of Atg14L (left) and UVRAG (right), in buffer containing 1M NaCl representing high-salt condition.



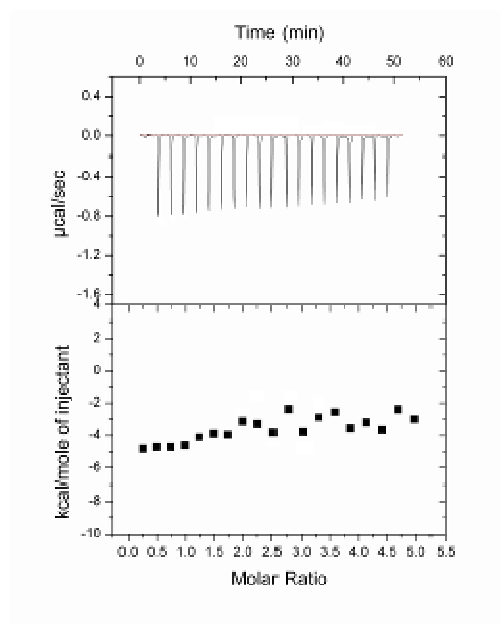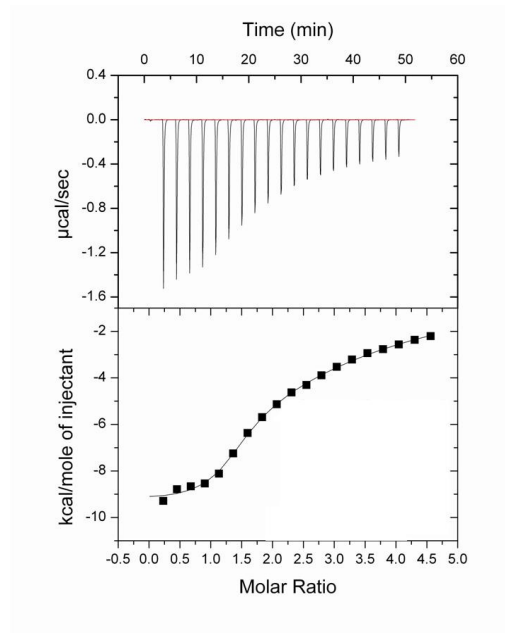

**Supplementary Figure S9. Competitive binding of Atg14L and UVRAG to Beclin 1 CC domain**

The ITC titration profile of Beclin 1 CC domain with the coiled coil region of Atg14L, in the presence of excessive amount of UVRAG (left); or with the coiled coil region of UVRAG, in the presence of excessive amount of Atg14L (right).

Sample 217-224

**Mw = 23878 Variance = 4.71094E-5**

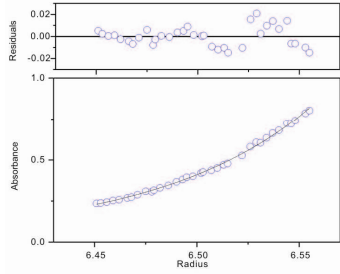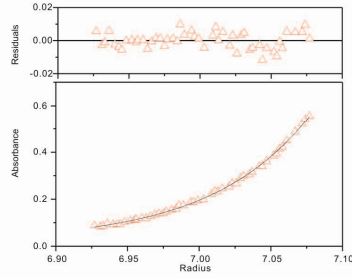

Sample 189-255

**Mw = 24108 Variance = 5.01849E-5**

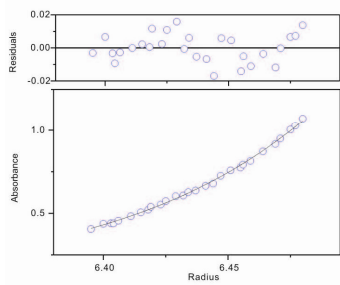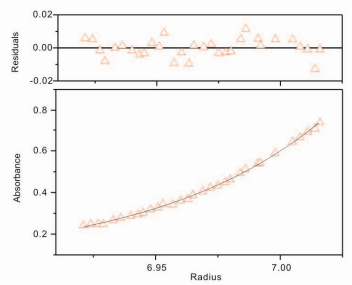

Sample 217-224-255

**Mw = 22248 Variance = 1.26753E-5**

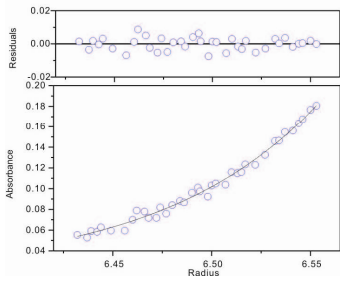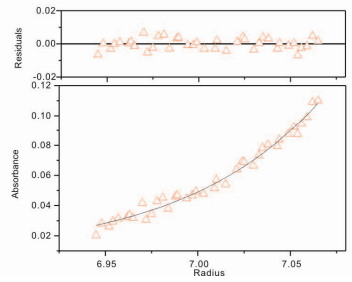

Sample 178-259

**Mw = 10214 Variance = 4.95264E-5**

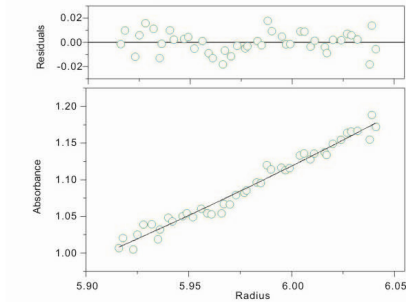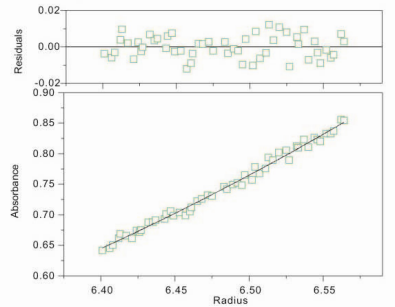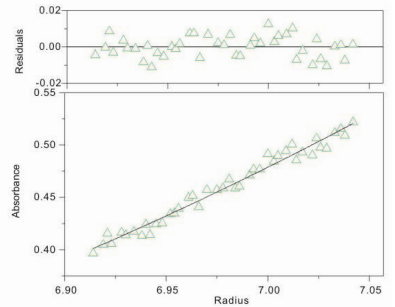

Sample wild-type

**Mw = 21072 Variance = 3.38805E-5**

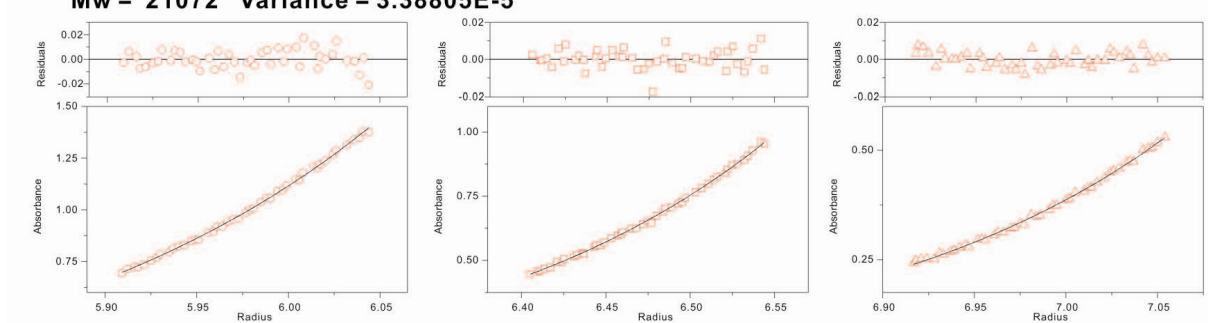

Sample 189-217-224-255

**Mw = 44125 Variance = 2.99794E-5**

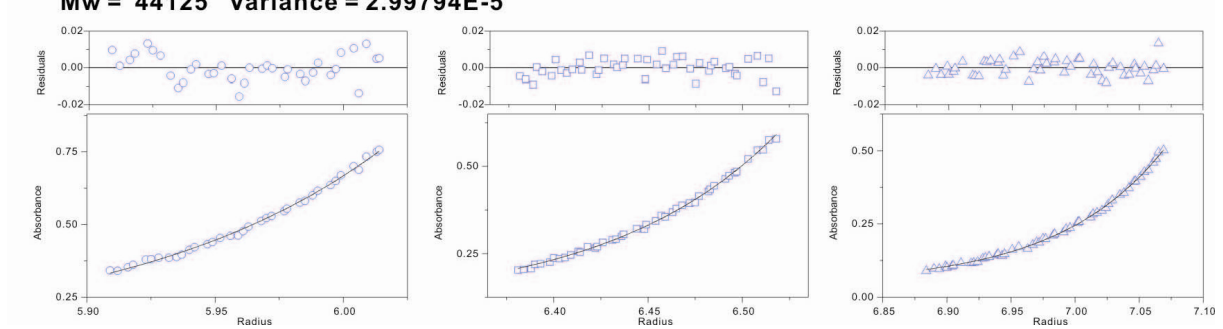

## Supplementary Figure S10. The oligomeric state of MutM and MutStab mutants of Beclin 1 CC domain

The sedimentation equilibrium profile of MutM and MutStab mutants of Beclin 1 CC domain as measured by analytical ultracentrifugation.

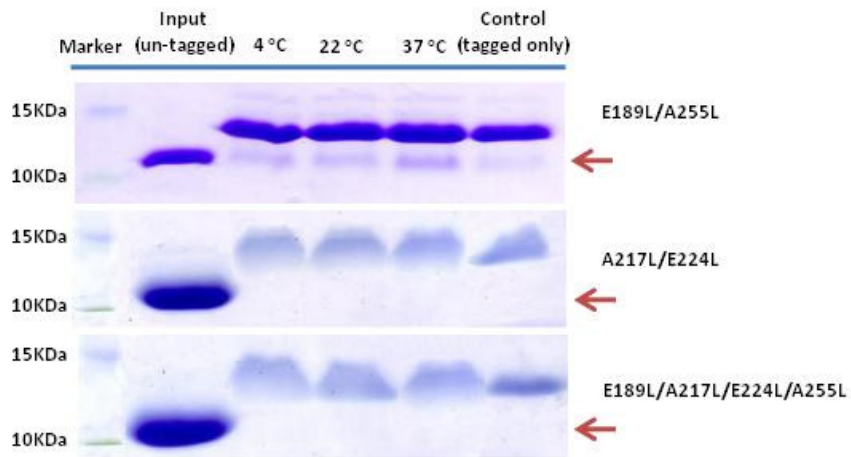

**Supplementary Figure S11. The Dynamic exchange assay of MutStab constructs of Beclin 1**

The assay was conducted as described in Fig. 2c. The expected heterodimeric Beclin 1 CC domain, consisting of one monomer with his-tag and the other monomer without tag, is indicated by the arrows.

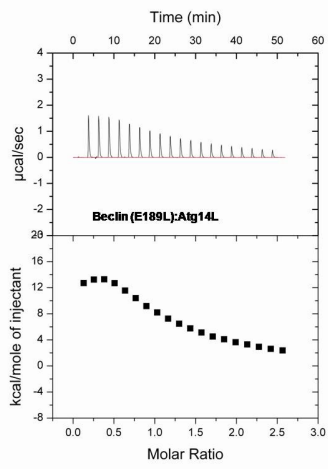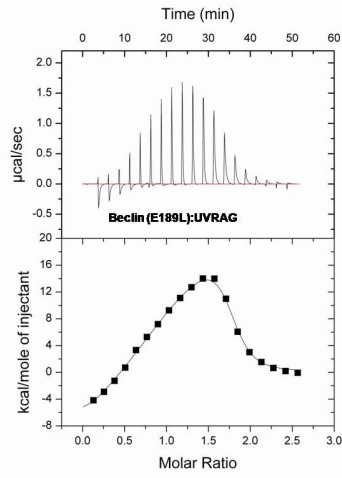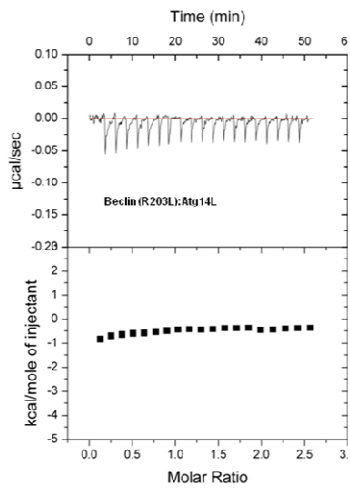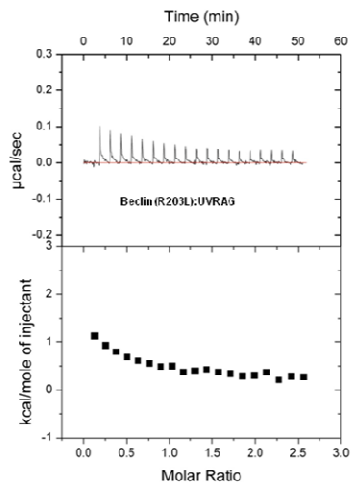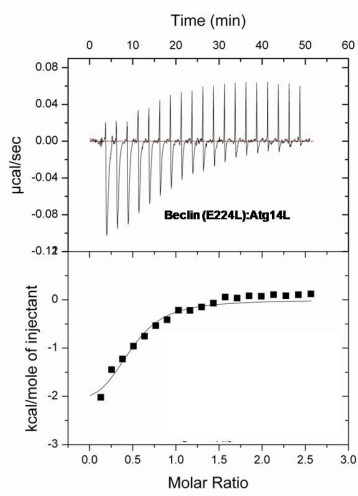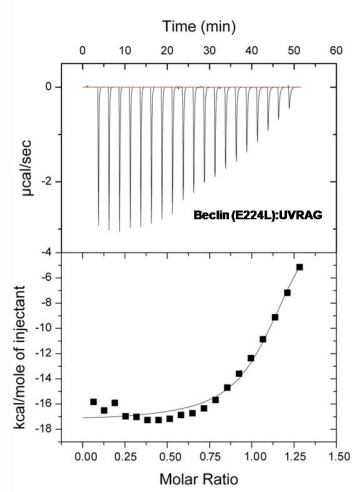

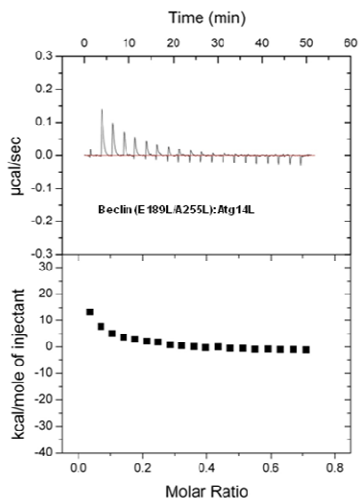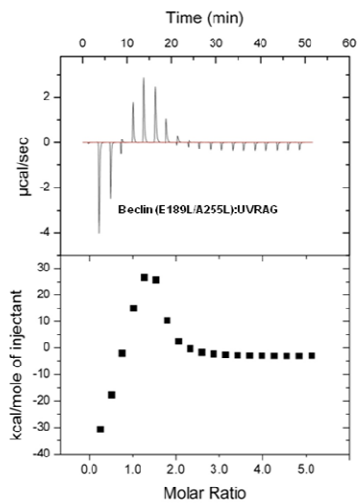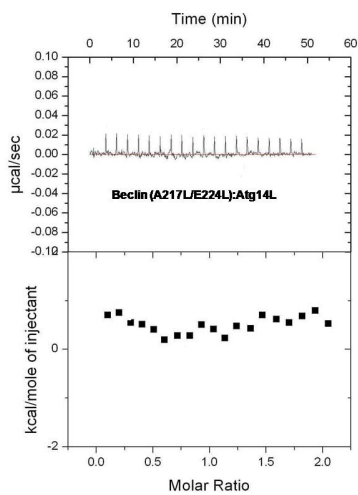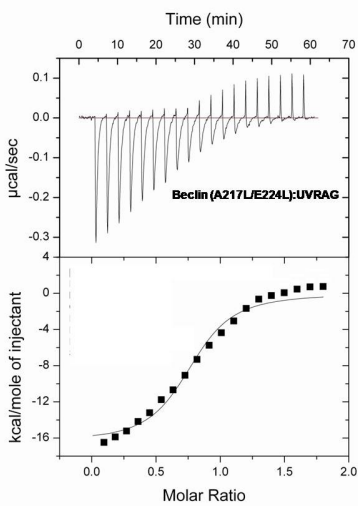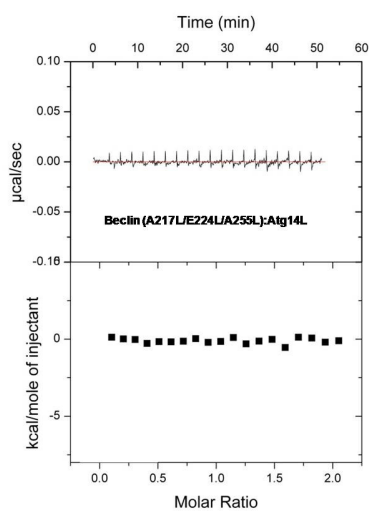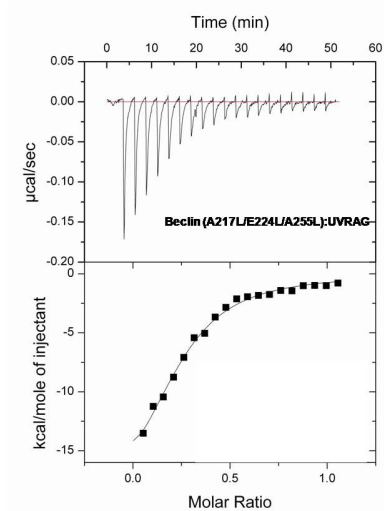

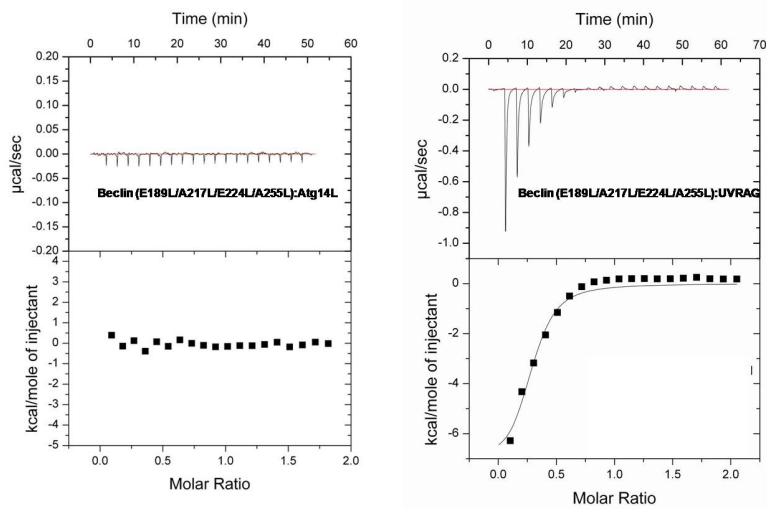

**Supplementary Figure S12. Interaction of MutM and MutStab mutants of Beclin 1 CC domain with Atg14L and UVRAG coiled coil region**

The ITC titration profile of various MutM and MutStab mutants of Beclin 1 CC domain with the coiled coil region of Atg14L (left) and UVRAG (right) respectively.

**Supplementary Table S1** Data collection, phasing and refinement statistics (MIR)

|                                                                   | Native                    | AuCl <sub>4</sub>         | NH <sub>4</sub> I         |
|-------------------------------------------------------------------|---------------------------|---------------------------|---------------------------|
| <b>Data collection</b>                                            |                           |                           |                           |
| Space group                                                       | C2                        | C2                        | C2                        |
| Cell dimensions                                                   |                           |                           |                           |
| <i>a, b, c</i> (Å)                                                | 103.78, 38.35, 65.75      | 103.77, 38.37, 62.82      | 103.50, 38.37, 65.43      |
| $\alpha, \beta, \gamma$ (°)                                       | 90, 97.92, 90             | 90, 97.94, 90             | 90, 98.65, 90             |
| Resolution (Å) <sup>a</sup>                                       | 37.88-1.86<br>(1.96-1.86) | 37.90-1.94<br>(2.04-1.94) | 37.48-1.86<br>(1.96-1.86) |
| <i>R</i> <sub>sym</sub> or <i>R</i> <sub>merge</sub> <sup>b</sup> | 2.9% (11.0%)              | 2.3% (8.1%)               | 7.1% (17.4%)              |
| <i>I</i> / $\sigma I$ <sup>b</sup>                                | 32.5 (12.2)               | 34.5 (14.1)               | 23.1 (8.5)                |
| Completeness (%) <sup>b</sup>                                     | 100 (100)                 | 100 (100)                 | 96.6 (94.3)               |
| Redundancy <sup>b</sup>                                           | 4.0 (3.9)                 | 3.9 (3.8)                 | 7.3 (7.4)                 |
| <b>Refinement</b>                                                 |                           |                           |                           |
| Resolution (Å)                                                    | 37.90-1.90                |                           |                           |
| No. reflections                                                   | 19438                     |                           |                           |
| <i>R</i> <sub>work</sub> / <i>R</i> <sub>free</sub>               | 20.88% / 23.63%           |                           |                           |
| No. atoms                                                         |                           |                           |                           |
| Protein                                                           | 1592                      |                           |                           |
| Ligand/ion                                                        | N/A                       |                           |                           |
| Water                                                             | 279                       |                           |                           |
| <i>B</i> -factors                                                 |                           |                           |                           |
| Protein                                                           | 23.68                     |                           |                           |
| Ligand/ion                                                        | N/A                       |                           |                           |
| Water                                                             | 38.50                     |                           |                           |
| R.m.s deviations                                                  |                           |                           |                           |
| Bond lengths (Å)                                                  | 0.014                     |                           |                           |
| Bond angles (°)                                                   | 1.243                     |                           |                           |

<sup>a</sup> Numbers in parenthesis define the highest resolution shell of data.

<sup>b</sup> Numbers in parenthesis are the statistics for the highest resolution shell of data

**Supplementary References:**

- 42 Strelkov, S. V. & Burkhard, P. Analysis of alpha-helical coiled coils with the program TWISTER reveals a structural mechanism for stutter compensation. *J Struct Biol* **137**, 54-64 (2002).
- 43 Hu, C.D., Chinenov, Y., and Kerppola, T.K. Visualization of interactions among bZIP and Rel family proteins in living cells using bimolecular fluorescence complementation. *Mol Cell* **9**, 789-798 (2002).
